# Supplementary material for: Surface modified Li4Ti5O12 by paper templated approach for enhanced interfacial Li+ charge transfer in Li-ion batteries
Source: Royal Society of Chemistry journal article supplement (doi:10.1039/c8ra07953f), 2018-01-01
Supplement: c8ra07953f1.pdf [file c8ra07953f1.pdf]

Electronic Supplementary information

**Surface Modified  $\text{Li}_4\text{Ti}_5\text{O}_{12}$  by Paper Templated Approach for  
Enhanced Interfacial  $\text{Li}^+$  Charge Transfer in Li-Ion Batteries**

Ujjwala V Kawade,<sup>a</sup> Manish S Jayswal<sup>a</sup>, Anuradha A Ambalkar,<sup>a</sup> Sunil R Kadam,<sup>b</sup> Rajendra P Panmand,<sup>a</sup> Jalinder D Ambekar<sup>a</sup>, Milind V Kulkarni,<sup>\*a</sup> Bharat B Kale<sup>\*a</sup>

---

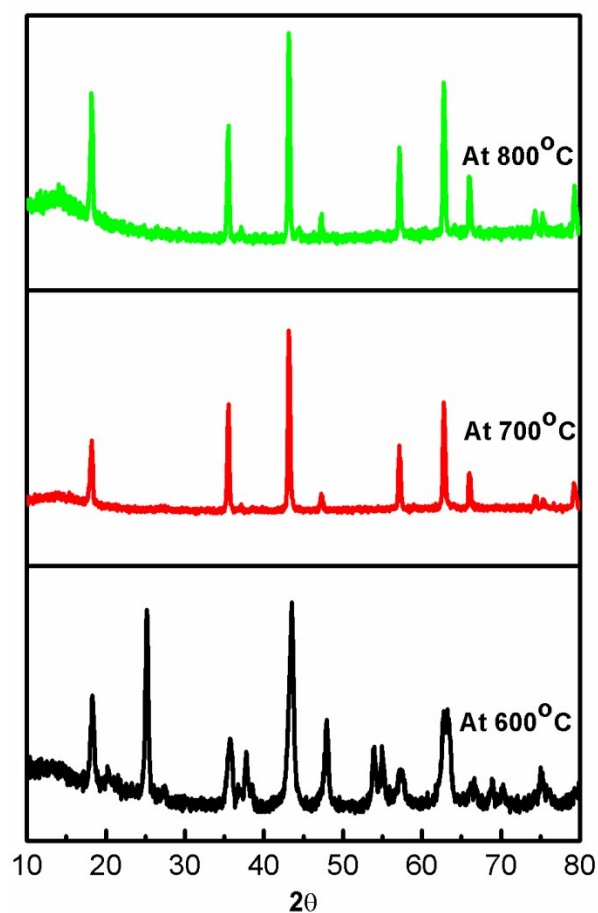

Figure S1 . XRD patterns of  $\text{Li}_4\text{Ti}_5\text{O}_{12}$  samples at 600°, 700° and 800°

**Table S1.** The compounds name with respect to the ref code of XRD

| No. | Ref. Code   | Compound Name   | Chemical Formula |         | Matched by                            | Rel. Int. [%] |
|-----|-------------|-----------------|------------------|---------|---------------------------------------|---------------|
|     |             |                 |                  | 2θ      |                                       |               |
| 1   | 00-024-0646 | Lithium Oxalate | $C_2 Li_2 O_4$   | 18.3329 | 00-049-1433                           | 44.87         |
| 2   | 00-049-1433 | Titanium Oxide  | $Ti O_2$         | 20.3195 | 00-024-0646; 00-049-1433              | 6.51          |
| 3   | 01-071-1168 | Titanium Oxide  | $Ti O_2$         | 25.1814 | 01-071-1168                           | 93.94         |
|     |             |                 |                  | 27.3529 | 00-024-0646                           | 5.89          |
|     |             |                 |                  | 35.8154 | 00-024-0646                           | 32.85         |
|     |             |                 |                  | 37.78   | 00-024-0646; 00-049-1433; 01-071-1168 | 28.54         |
|     |             |                 |                  | 43.573  | 00-024-0646                           | 100           |
|     |             |                 |                  | 47.9478 | 00-024-0646; 01-071-1168              | 47.11         |
|     |             |                 |                  | 53.9195 | 00-024-0646; 01-071-1168              | 26.9          |
|     |             |                 |                  | 54.9439 | 00-024-0646; 01-071-1168              | 27.75         |
|     |             |                 |                  | 57.2933 | 00-024-0646; 00-049-1433              | 17.29         |
|     |             |                 |                  | 62.682  | 00-024-0646; 01-071-1168              | 45.68         |
|     |             |                 |                  | 63.3618 | 00-024-0646                           | 44.63         |
|     |             |                 |                  | 66.4664 | 00-024-0646; 00-049-1433              | 6.53          |
|     |             |                 |                  | 68.8655 | 00-024-0646; 01-071-1168              | 9.8           |
|     |             |                 |                  | 70.2284 | 00-024-0646; 01-071-1168              | 8.48          |
|     |             |                 |                  | 75.2523 | 00-049-1433; 01-071-1168              | 14.24         |

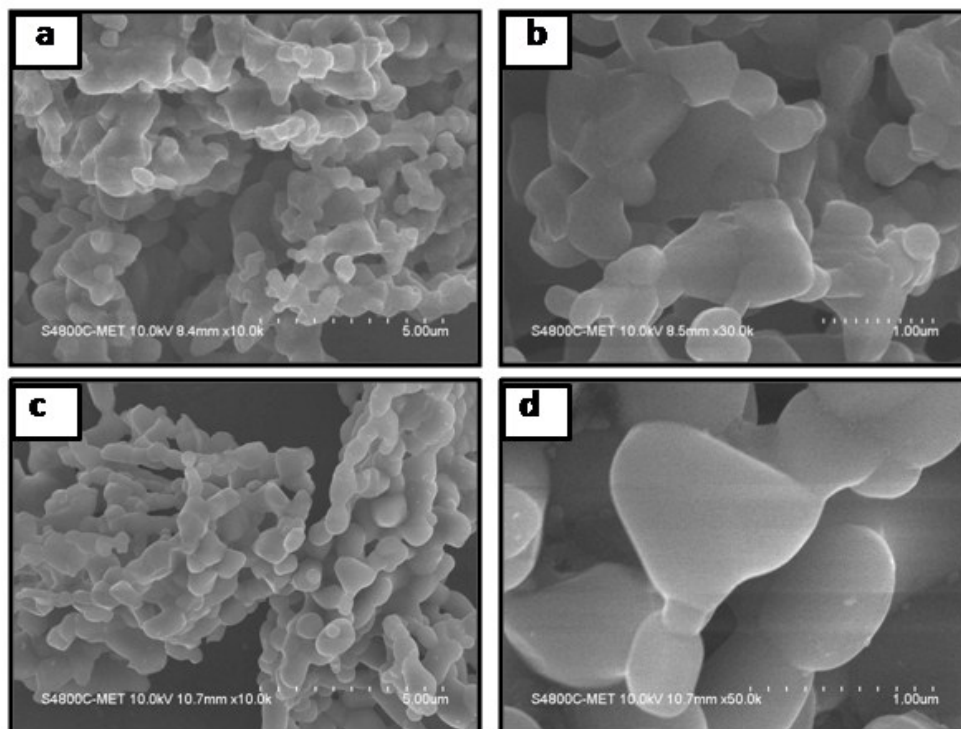

**Figure S2. FESEM images of (a) LTS1 and (b) LTS3 at low and high magnifications**
